# Supplementary material for: Next-Generation Sequencing of Aquatic Oligochaetes: Comparison of Experimental Communities
Source: PubMed Central journal article supplement (PMC4750909; doi:10.1371/journal.pone.0148644), 2016-02-11

sample 1

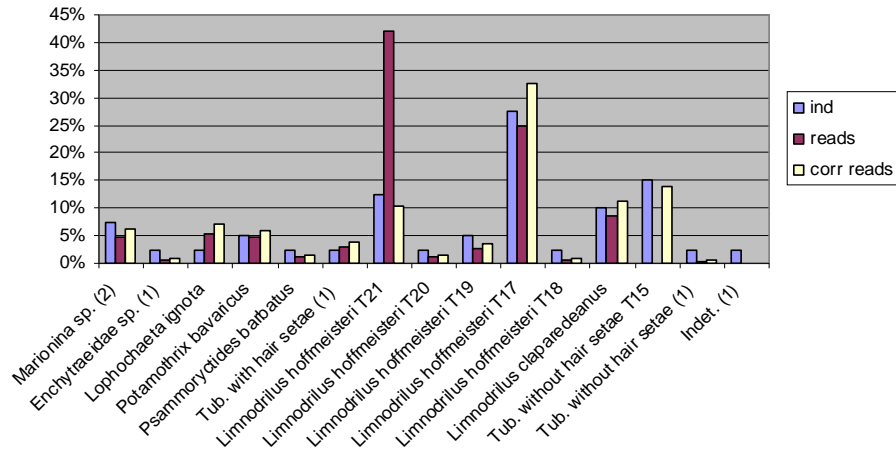

sample 2

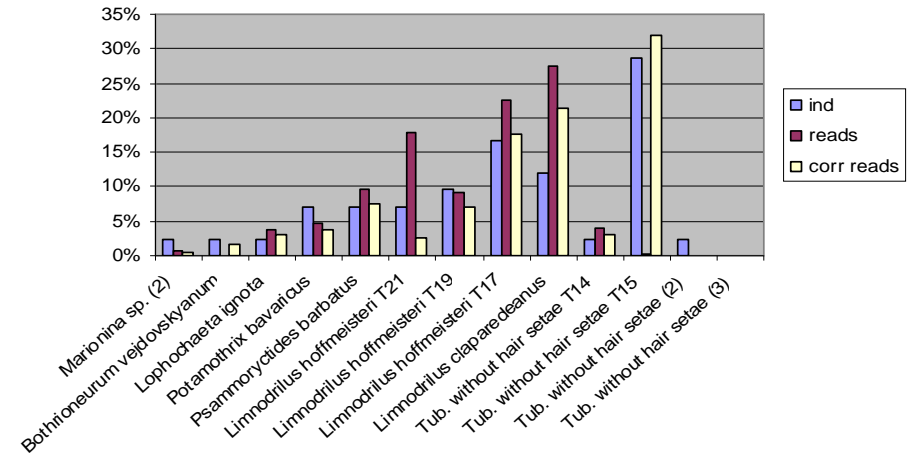

sample 3

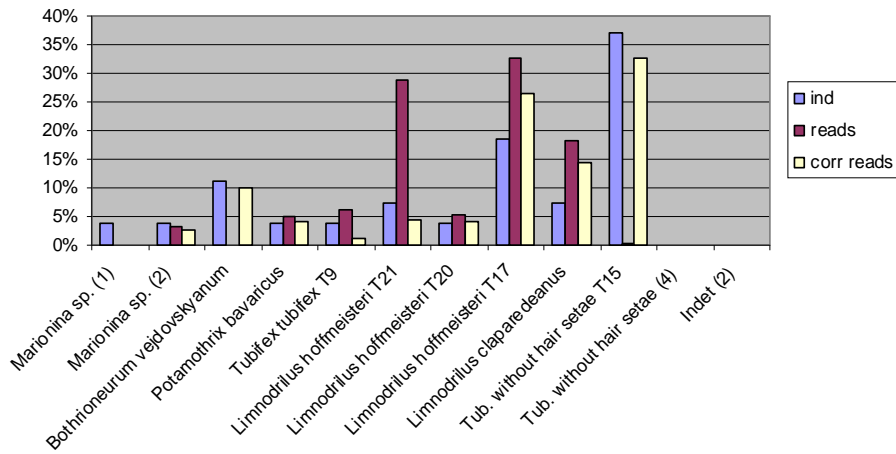

sample 4

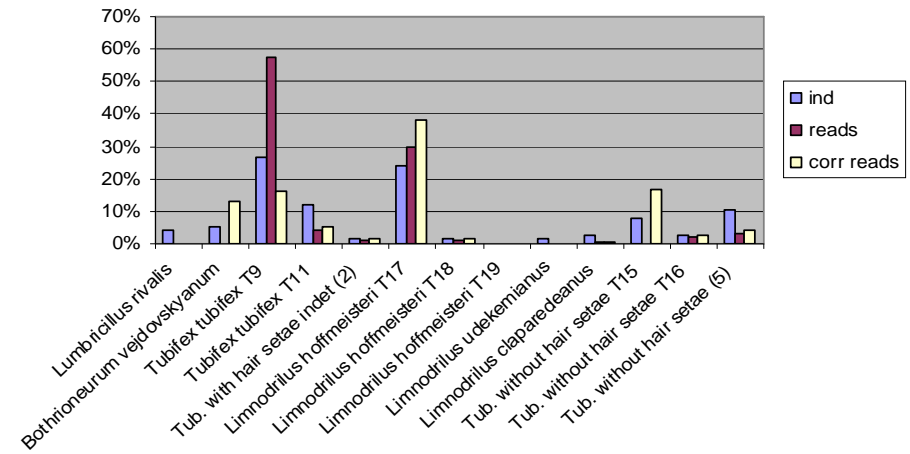

sample 5

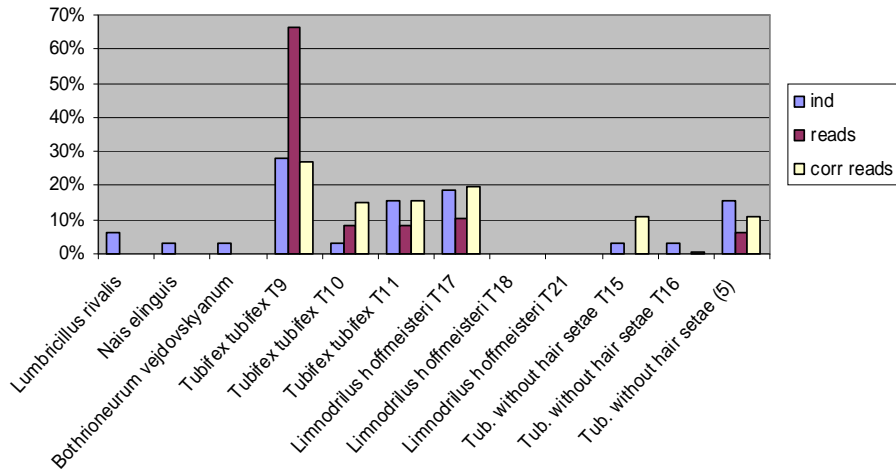

sample 6

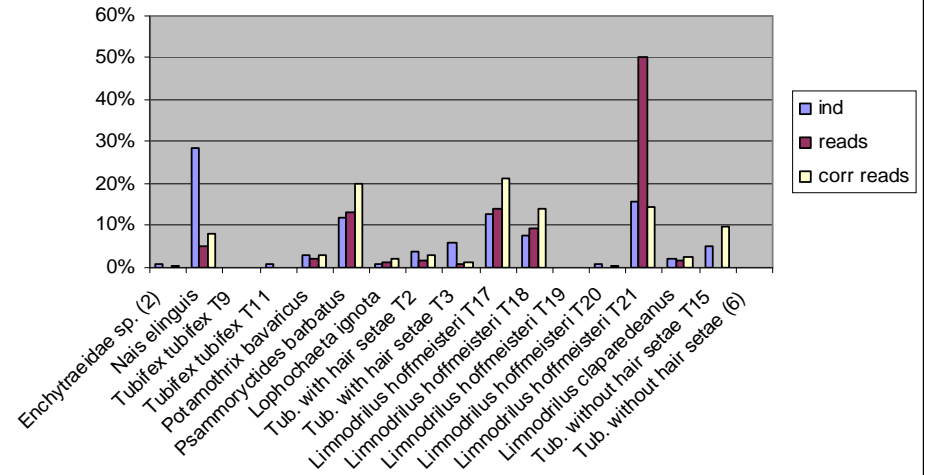

Supplement: pone.0148644.s001.pdf [file pone.0148644.s001.pdf]
