# Supplementary material for: Next-Generation Sequencing of Aquatic Oligochaetes: Comparison of Experimental Communities
Source: PubMed Central journal article supplement (PMC4750909; doi:10.1371/journal.pone.0148644), 2016-02-11

- Limnodrilus hoffmeisteri T17
- △— Limnodrilus hoffmeisteri T20
- +· Limnodrilus hoffmeisteri T21
- ×- Limnodrilus claparedeanus T22
- ◇— Tubifex ignotus T6
- ▽- Limnodrilus hoffmeisteri T18
- Tubifex tubifex T9
- \*- Tubifex tubifex T11
- ◇· Tub. without hair setae indet (5)
- ⊕- Tub. without hair setae T15
- ⊗- Bothrioneurum vej dovskyanum R1
- ⊞- Lumbricillus rivalis

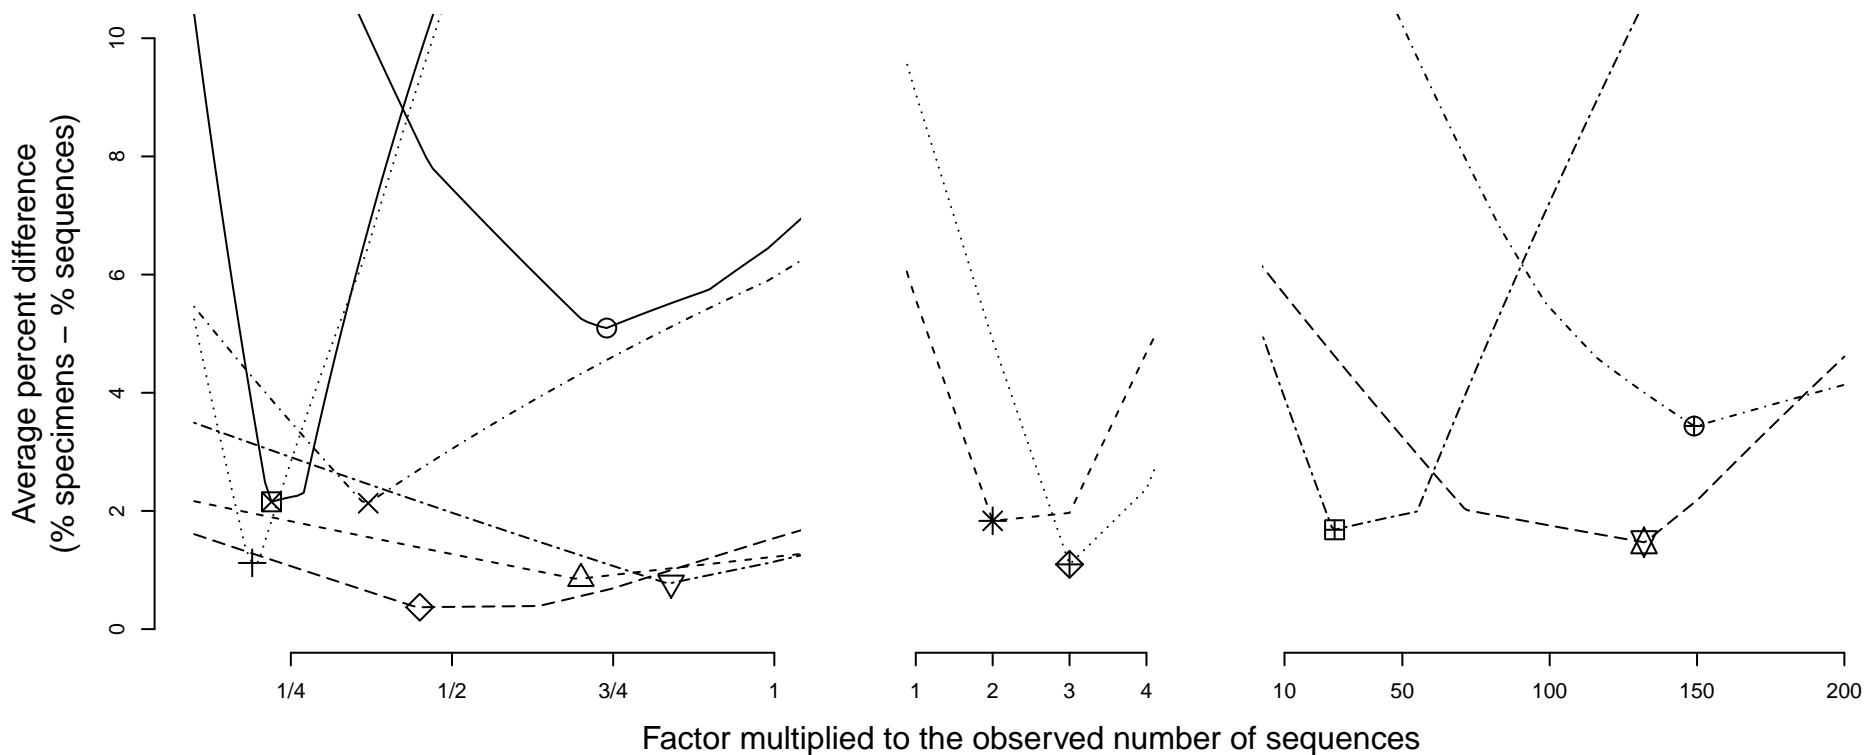

Supplement: pone.0148644.s002.pdf [file pone.0148644.s002.pdf]
